# Supplementary material
Source: MDPI journal article supplement (https://www.mdpi.com/2077-0472/13/6/1166)
Supplement: s1 [file s1]

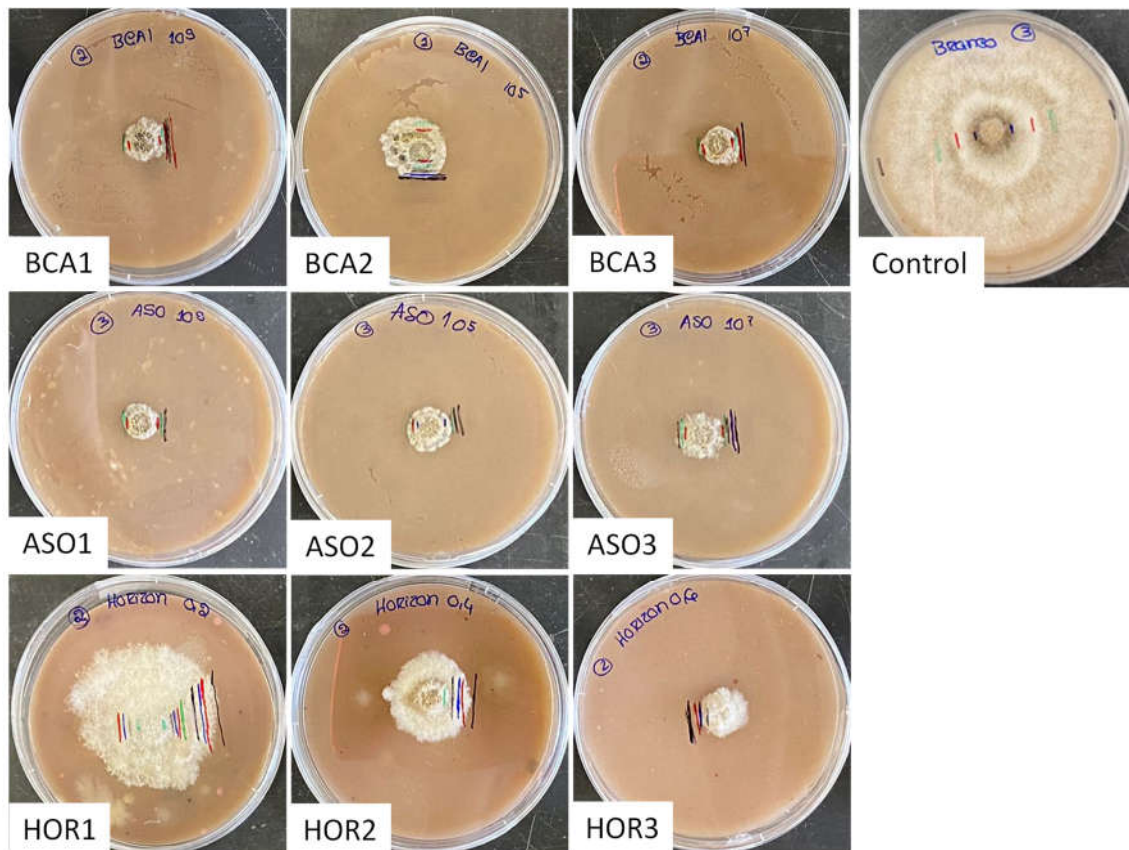

**Figure S2.** Morphological images after 23 days of incubation of *Gnomoniopsis smithogiloyi* in chestnut-based medium, in presence of the antifungal agents at three different concentrations of CIMO-BCA1 (*Bacillus amyloliquefaciens*, BCA), Serenade® (*Bacillus amyloliquefaciens* QST 713, ASO), and Horizon® (tebuconazole, HOR). Control: *Gnomoniopsis smithogiloyi*.
