# Supplementary material
Source: MDPI journal article supplement (https://www.mdpi.com/2077-0472/13/6/1166)
Supplement: s1 [file s1]

Archive with 2 entries (2 files):
- Figure S1_agriculture-2404639_R2.pdf
- Figure S2_agriculture-2404639_R2.pdf
